# Supplementary material for: Vaccination with Acinetobacter baumannii adhesin Abp2D provides protection against catheter-associated urinary tract infection
Source: PubMed Central journal article supplement (PMC10441454; doi:10.21203/rs.3.rs-3213777/v1), 2023-08-10
Supplement: NIHPPrs3213777v1-supplement-1.pdf [file NIHPPrs3213777v1-supplement-1.pdf]

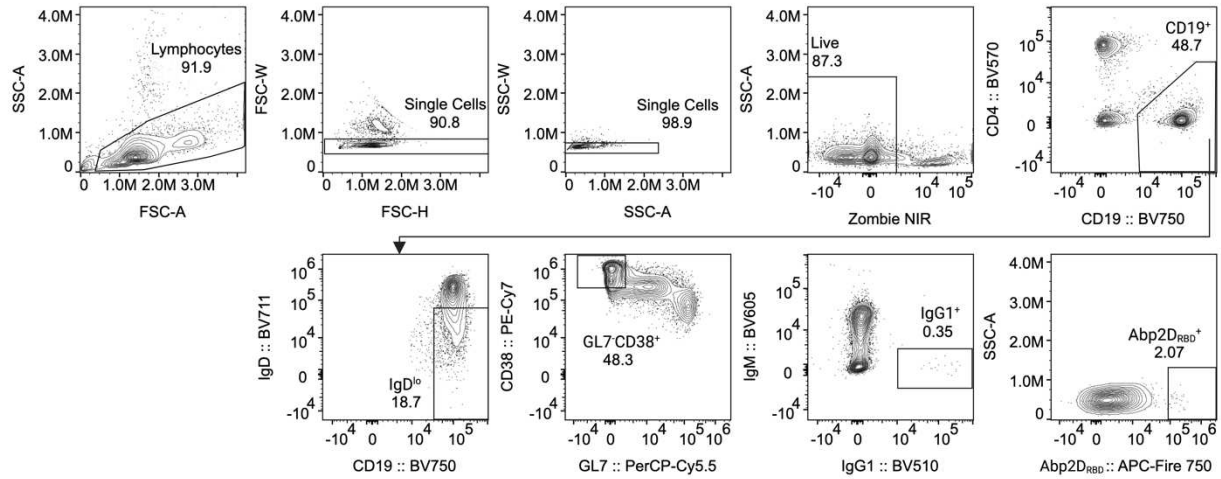

622  
623  
624  
625  
626

**Supplemental Figure 1: Flow cytometry gating strategy for Abp2D<sup>+</sup> splenic memory B cells.** Splenocytes were stained and gated on lymphocytes/single cells/live/CD4<sup>-</sup> CD19<sup>+</sup>/IgD<sup>lo</sup>/GL7<sup>-</sup> CD38<sup>+</sup>/IgG1<sup>+</sup>/Abp2D<sub>RBD</sub><sup>+</sup>.
